# Supplementary material
Source: publisher figshare collection journal article supplement (https://acs.figshare.com/ndownloader/files/3935200)
Supplement: Supplementary file 1 [file 3935200]

## Supplementary Information

### Materials:

Titanium (IV) Isopropoxide (97+ %) was purchased from Alfa Aesar. Benzaldehyde (98 %) was purchased from Baker and Adamson. Ammonium Metatungstate Hydrate ( $\geq 99.0$  %) and Acetophenone ( $\geq 99.0$  %) were purchased from Fluka. Methyl Alcohol Anhydrous (98.8 %) was purchased from Acros. Phenylacetaldehyde ( $\geq 90$  %) and Phenylacetaldehyde Dimethyl Acetal (98+ %) were purchased from SACF. Zirconium (IV) Butoxide (80% wt in 1-butanol), Hafnium (IV) Chloride (98 %), Poly (ethylene glycol)- block- Poly(propylene glycol)-block-Poly(ethylene glycol) PEO<sub>20</sub>-PPO<sub>70</sub>-PEO<sub>20</sub> (Pluronic P123), Cyclohexanone ( $\geq 99.5$  %), (1,1-Dimethoxy-ethyl) Benzene (97 %), Benzaldehyde Dimethyl Acetal (99 %), Cyclohexanone Dimethyl Ketal (99 %), Nitric acid (70 %), and Trans-Cinnamonaldehyde ( $\geq 99$  %) were purchased from Sigma-Aldrich. Commercial catalysts P-25 was purchased from Degussa Inc., ZSM-5 was purchased from Zeolyst Inc., and Amberlyst 15 was purchased from Sigma-Aldrich. All chemicals were used directly as received and without further purification.

**Table S1. Ti 2p<sub>3/2</sub>, O 1s, and W 4f<sub>7/2</sub> XPS binding energies (BE) of X% W-Ti (X=0, 5, 10, 20, 30) and WO<sub>3</sub>.**

|                       | <b>Ti 2p<sub>3/2</sub></b> | <b>O 1s</b>    | <b>W 4f<sub>7/2</sub></b> |
|-----------------------|----------------------------|----------------|---------------------------|
| <b>Catalyst</b>       | <b>BE (eV)</b>             | <b>BE (eV)</b> | <b>BE (eV)</b>            |
| <b>WO<sub>3</sub></b> | -                          | 530.79         | 35.84                     |
| <b>0%W-Ti</b>         | 459.07                     | 530.72         | -                         |
| <b>5%W-Ti</b>         | 458.44                     | 530.23         | 35.71                     |
| <b>10%W-Ti</b>        | 458.44                     | 529.85         | 35.64                     |
| <b>20%W-Ti</b>        | 458.61                     | 529.93         | 35.58                     |
| <b>30%W-Ti</b>        | 458.67                     | 529.91         | 35.40                     |

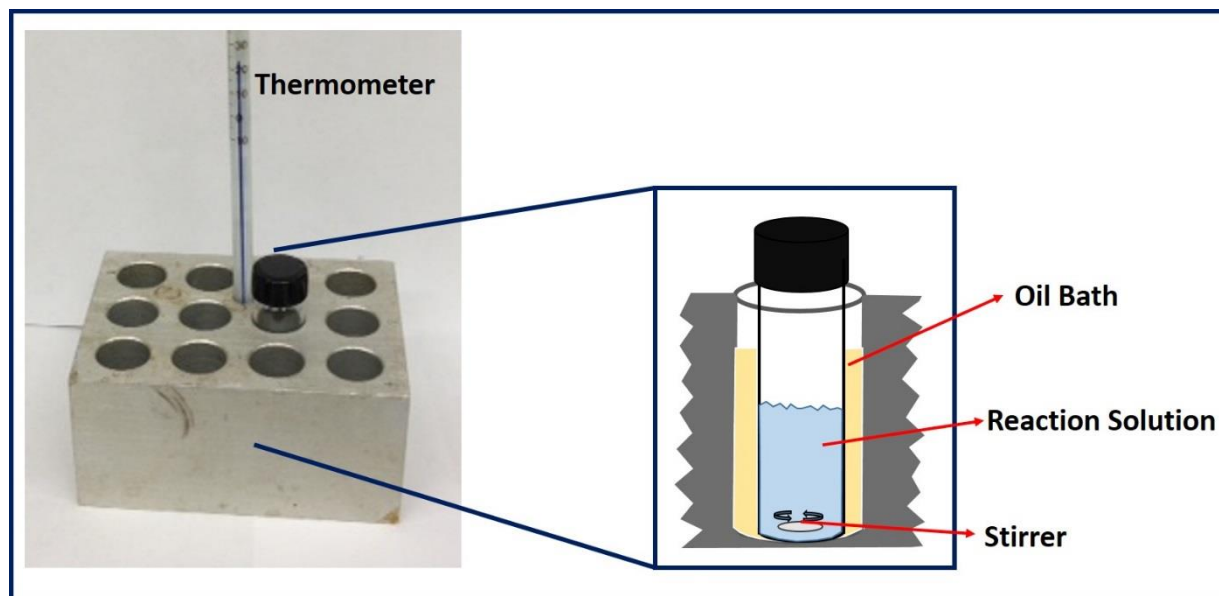

**Figure 1S.** Picture and schematic description of catalytic study set up (Dimensions of set up: 5x5x10 cm.).

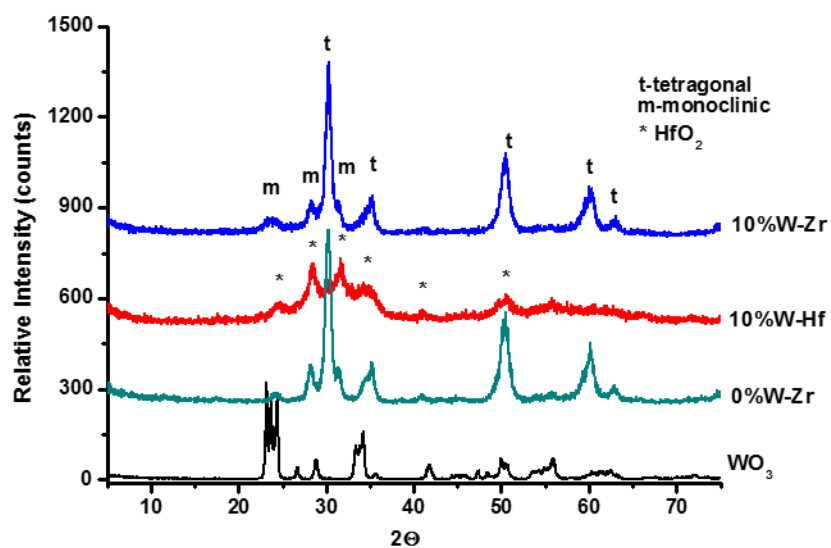

**Figure 2S.** Wide-angle PXRD patterns of 0% W-Zr, 10% W-Zr, 10% W-Hf, and WO<sub>3</sub>.

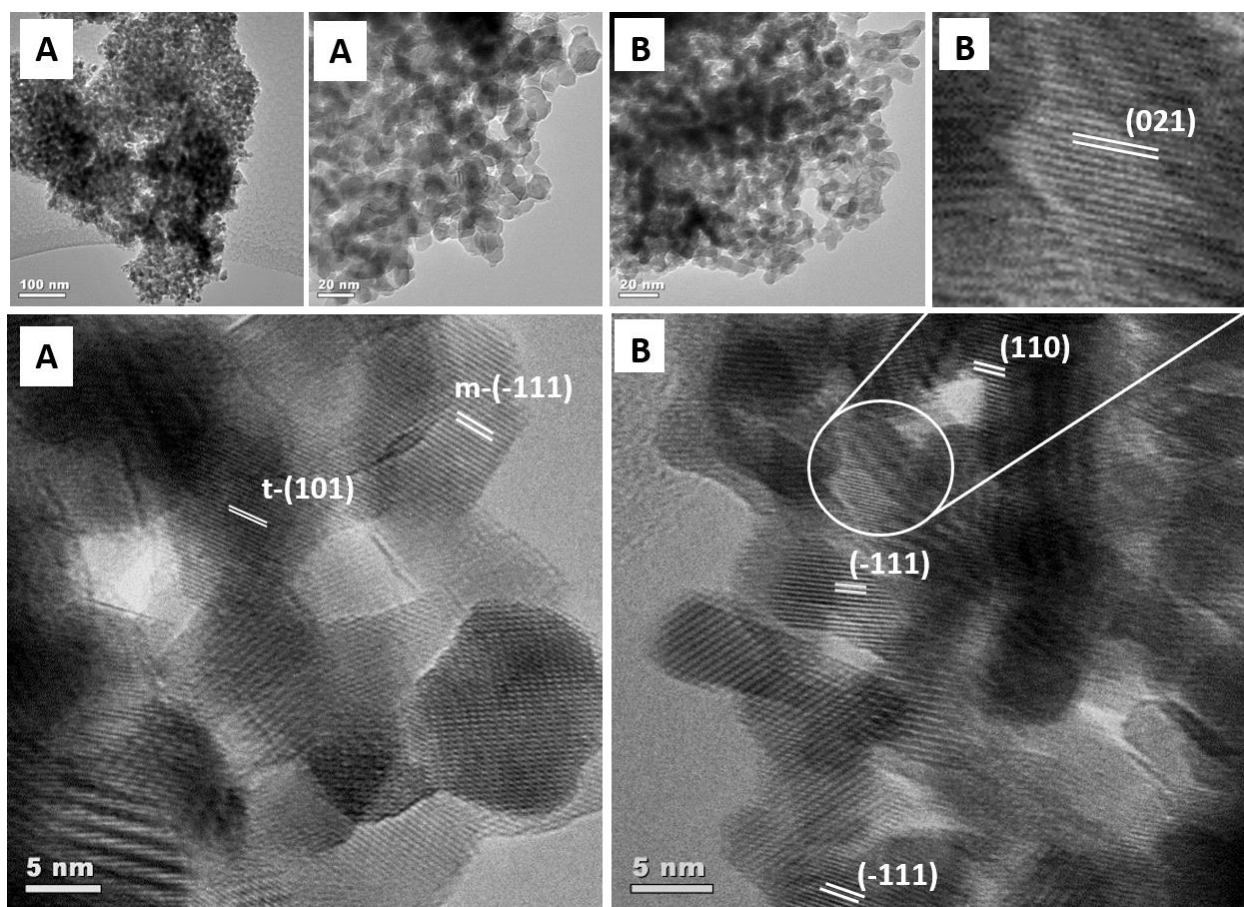

**Figure S3.** HR-TEM images of (A) 10% W-Zr (m stands for monoclinic phase and t stands for tetragonal phase) and (B) 10% W-Hf.

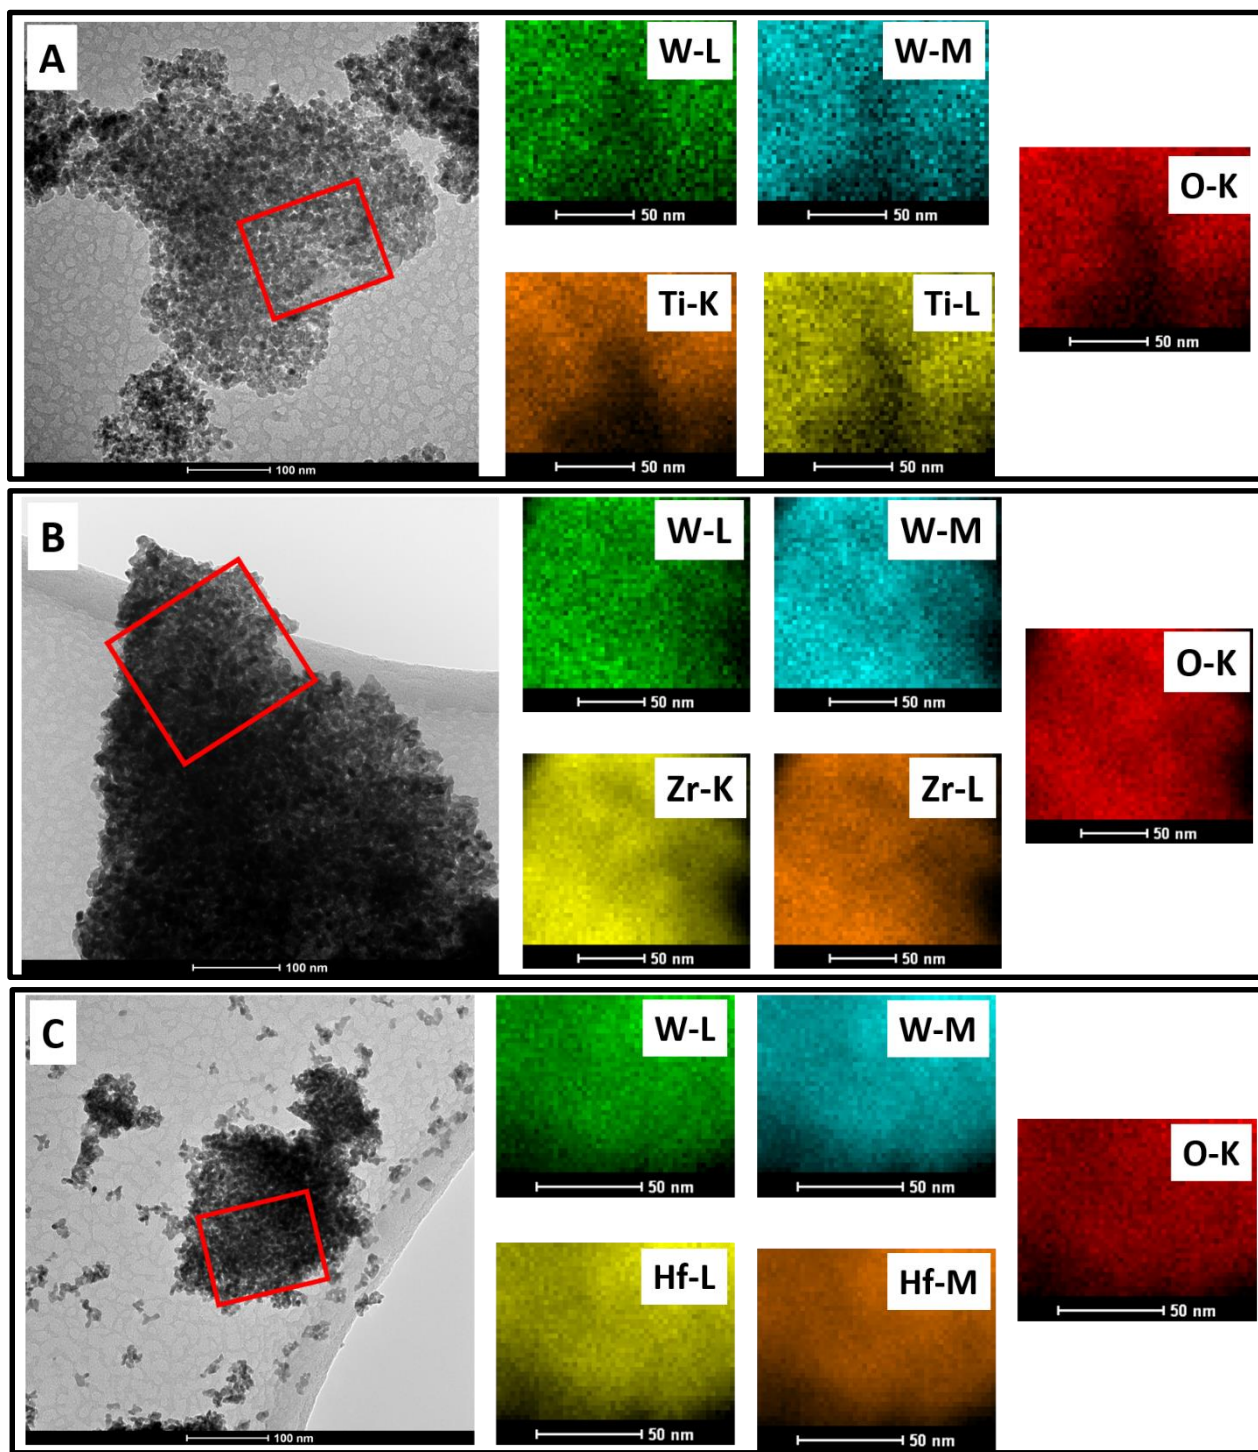

**Figure S4.** TEM images and EDAX mapping at selected area (red box in TEM images) of (A) 10% W-Ti (B) 10% W-Zr, and (C) W-Hf samples.

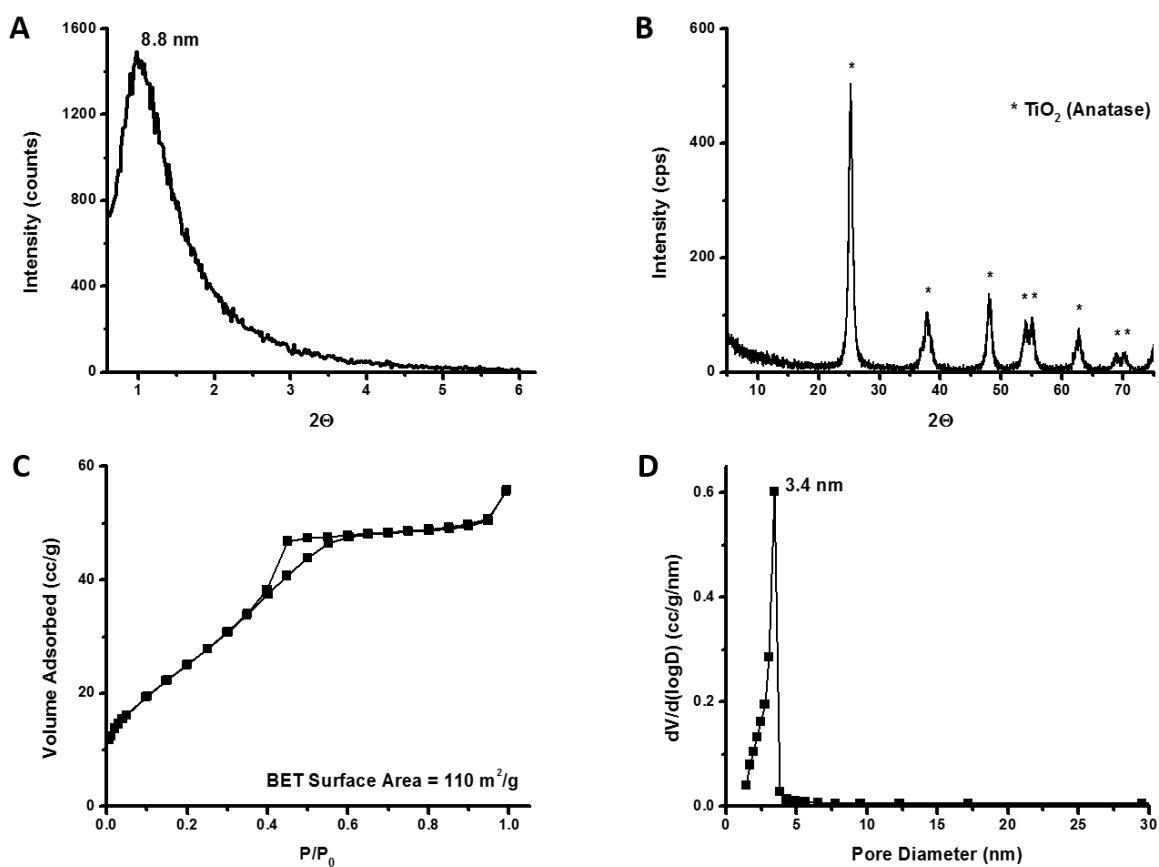

**Figure S5.** (A) Low-angle PXRD, (B) Wide-angle PXRD, (C)  $\text{N}_2$  sorption isotherm, and (D) BJH Desorption pore size distribution of 0% W-Ti sample calcined at 450°C for 4 h.

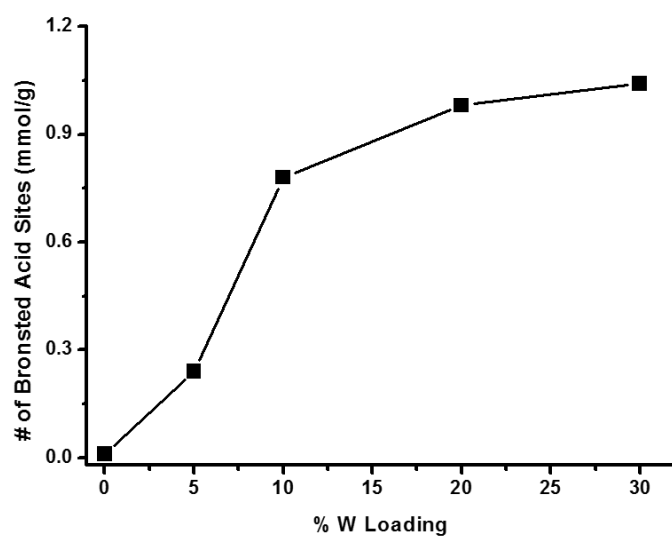

**Figure S6.** Number of Brønsted acid sites of X% W-Ti samples (X= 0, 5, 10, 20, 20) determined by titration experiments.

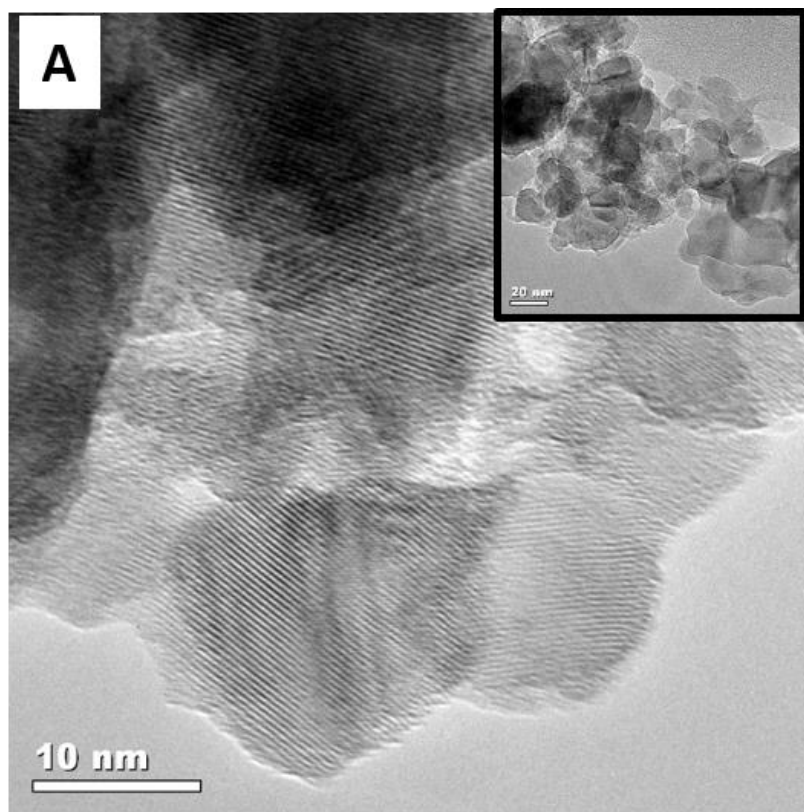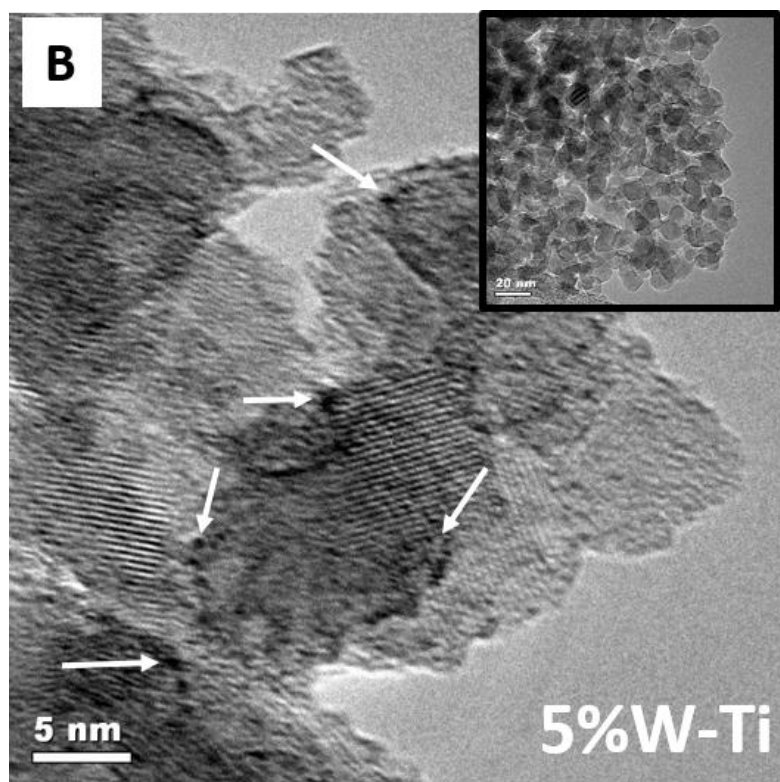



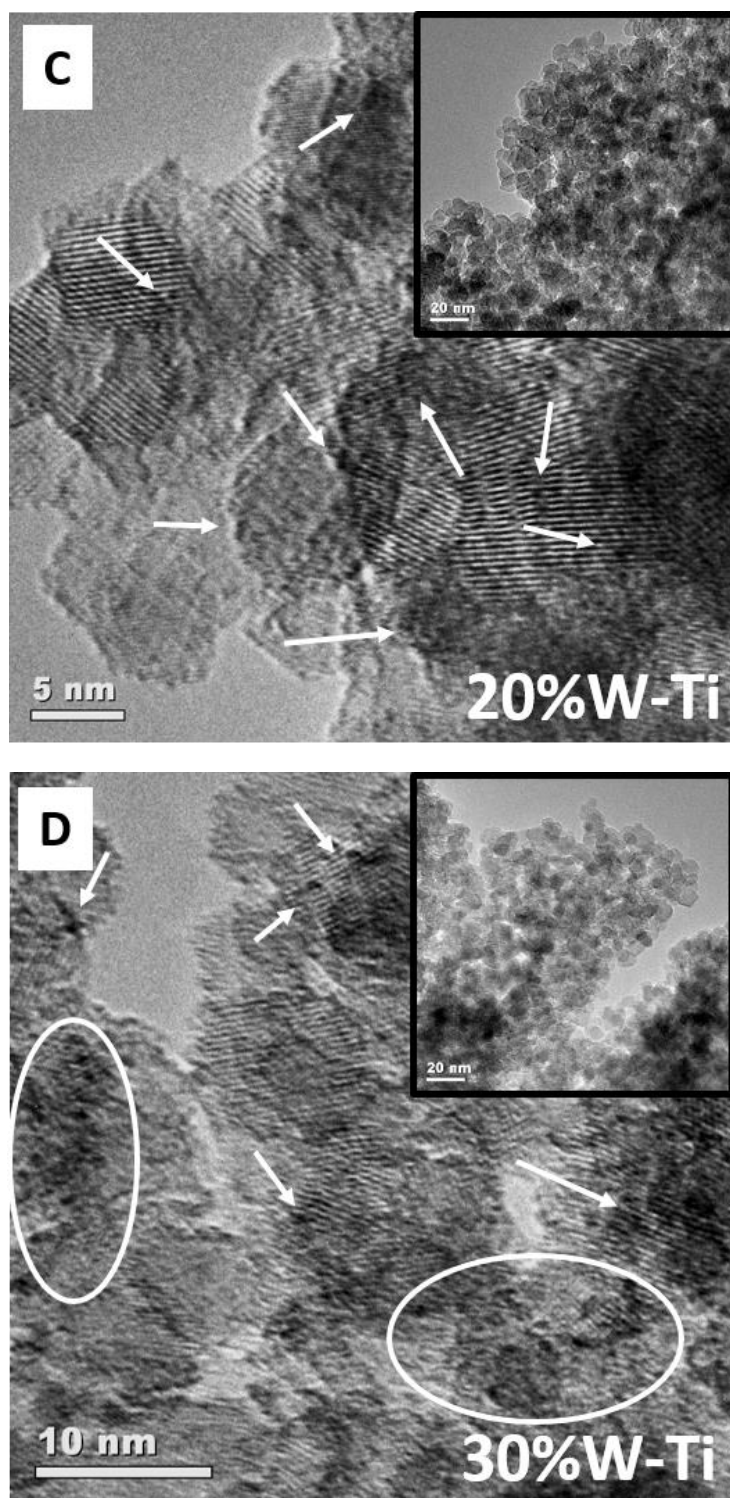

**Figure S7.** HR-TEM images of (A) 0% W-Ti, (B) 5% W-Ti, (C) 20% W-Ti, and (D) 30% W-Ti. White arrows point some of the nano-WO<sub>x</sub> clusters and white circles highlight the regions with high number of nano-WO<sub>x</sub> clusters.



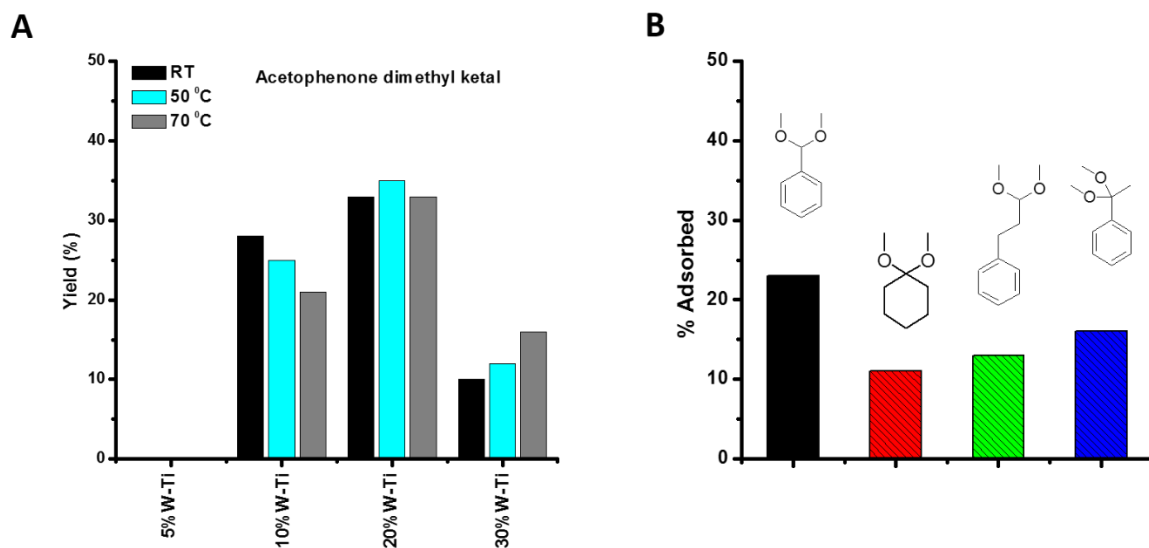

**Figure S8.** (A) Effect of temperature on acetophenone ketalization with X% W-Ti catalyst, where X = 5, 10, 20, 30 (0.5 mmol substrate in 5 mL MeOH (0.1 M), 25 mg of catalysts, RT-70°C, 4 h). (B) Adsorption of acetals and ketals on 10% W-Ti (1 mmol product in 5 mL MeOH (0.1 M), 25 mg of catalysts, RT, 2 h).
